# Supplementary material
Source: publisher figshare collection journal article supplement (https://sage.figshare.com/ndownloader/files/21974784)
Supplement: Supplementary file 1 [file 21974784]

**APPENDIX A.** Logistic Regression of Participation in Wave 2 on Wave 1 Variables (N=390)

|  |  |
| --- | --- |
| Female1 | .74 |
|  | (.42, 1.29) |
| *Race/Ethnicity*2 |  |
| Asian American | .77 |
|  | (.34, 1.77) |
| Non-White/Non-Asian American | .97 |
|  | (.46, 2.04) |
| Parent Attended College *(1=yes)* | 2.07* |
|  | (1.04, 4.13) |
| Currently Works Job for Pay *(1=yes)* | 1.07 |
|  | (.56, 2.02) |
| *Subjective Social Status*3 |  |
| Middle Class | 1.16 |
|  | (.54, 2.46) |
| Upper/Upper-Middle Class | 1.03 |
|  | (.45, 2.35) |
| Private High School4 | .41* |
|  | (.19, .85) |
| Extra Credit Participant in Wave 1 *(1=yes)* | .19*** |
|  | (.10, .34) |

*Notes*: Exponentiated coefficients (odds ratios) presented with 95% confidence intervals in parentheses. Model includes post-stratification weights for gender.

1Male is reference group; 2White is reference group for race/ethnicity; 3Lower/Middle-Lower Class is reference group for subjective social status; 4Public high school is reference group.

* *p* <.05; ** *p* <.01; *** *p* <.001 (two-tailed test).
